# Supplementary material for: Evolution of the Electronic Structure of the trans-[Re6S8bipy4Cl2] Octahedral Rhenium Cluster during Reduction
Source: MDPI journal article supplement (doi:10.3390/molecules28093658), 2023-04-23
Supplement: s1 [file s1]

# Evolution of the electronic structure of the *trans*- [Re<sub>6</sub>S<sub>8</sub>bipy<sub>4</sub>Cl<sub>2</sub>] octahedral rhenium cluster during reduction

Maxim R. Ryzhikov\*, Yakov M. Gayfulin, Anton A. Ulantikov,  
Dmitry O. Arentov, Svetlana G. Kozlova, Yuri V. Mironov\*

Nikolaev Institute of Inorganic Chemistry SB RAS, 3, Acad. Lavrentiev Ave., Novosibirsk, 630090, Russia

Table S1. The optimized coordinates of the [Re<sub>6</sub>S<sub>8</sub>Cl<sub>2</sub>bipy<sub>4</sub>]<sup>n</sup> (n=0; S=0) cluster calculated at S12g/TZP/ZORA/DMSO level of theory.

|    |              |              |              |
|----|--------------|--------------|--------------|
| Re | 0.591012760  | -1.384805510 | 1.055572150  |
| Re | 1.592484840  | 0.875890570  | 0.256764870  |
| Re | -1.592484840 | -0.875890570 | -0.256764870 |
| Re | -0.702868660 | 0.838898750  | 1.493838410  |
| Re | 0.702868660  | -0.838898750 | -1.493838410 |
| S  | 2.676484320  | -1.243240040 | -0.148944430 |
| S  | -0.288682890 | -2.873387380 | -0.627668360 |
| S  | -1.576531350 | -1.334167390 | 2.114477890  |
| S  | 1.389015460  | 0.296403340  | 2.591347610  |
| N  | 1.300441400  | -3.051947090 | 2.317657070  |
| Re | -0.591012760 | 1.384805510  | -1.055572150 |
| S  | 0.288682890  | 2.873387380  | 0.627668360  |
| S  | 1.576531350  | 1.334167390  | -2.114477890 |
| N  | 3.513938920  | 1.919812870  | 0.564463720  |
| S  | -2.676484320 | 1.243240040  | 0.148944430  |
| S  | -1.389015460 | -0.296403340 | -2.591347610 |
| N  | -3.513938920 | -1.919812870 | -0.564463720 |
| Cl | -1.629770540 | 1.945496070  | 3.461703610  |
| Cl | 1.629770540  | -1.945496070 | -3.461703610 |
| C  | 2.527876630  | -3.030401160 | 2.876086280  |
| C  | 0.530465020  | -4.136701160 | 2.541273730  |
| N  | -1.300441400 | 3.051947090  | -2.317657070 |
| C  | 4.557201680  | 1.717698840  | -0.266164070 |
| C  | 3.690289560  | 2.772223400  | 1.594558910  |
| C  | -4.557201680 | -1.717698840 | 0.266164070  |
| C  | -3.690289560 | -2.772223400 | -1.594558910 |
| H  | 3.132105480  | -2.149623540 | 2.682275190  |
| C  | 3.016142140  | -4.067467780 | 3.649163590  |
| C  | 0.955550670  | -5.211522050 | 3.300381120  |
| H  | -0.457370080 | -4.129275620 | 2.091168990  |
| C  | -2.527876630 | 3.030401160  | -2.876086280 |
| C  | -0.530465020 | 4.136701160  | -2.541273730 |
| H  | 4.396540890  | 1.024820800  | -1.086091070 |
| C  | 5.778905960  | 2.342382530  | -0.097615270 |
| C  | 4.884873970  | 3.429495090  | 1.824816700  |
| H  | 2.836106870  | 2.925808630  | 2.246791910  |

|   |              |              |              |
|---|--------------|--------------|--------------|
| H | -4.396540890 | -1.024820800 | 1.086091070  |
| C | -5.778905960 | -2.342382530 | 0.097615270  |
| C | -4.884873970 | -3.429495090 | -1.824816700 |
| H | -2.836106870 | -2.925808630 | -2.246791910 |
| H | 4.024656620  | -3.987831270 | 4.046375060  |
| C | 2.230376870  | -5.202915510 | 3.878384000  |
| H | 0.272975110  | -6.044192180 | 3.448696900  |
| H | -3.132105480 | 2.149623540  | -2.682275190 |
| C | -3.016142140 | 4.067467780  | -3.649163590 |
| C | -0.955550670 | 5.211522050  | -3.300381120 |
| H | 0.457370080  | 4.129275620  | -2.091168990 |
| H | 6.578888920  | 2.112382350  | -0.796295970 |
| C | 5.974872660  | 3.225443400  | 0.970523360  |
| H | 4.945557740  | 4.115701910  | 2.665381240  |
| H | -6.578888920 | -2.112382350 | 0.796295970  |
| C | -5.974872660 | -3.225443400 | -0.970523360 |
| H | -4.945557740 | -4.115701910 | -2.665381240 |
| C | 2.727145330  | -6.336715420 | 4.683660960  |
| H | -4.024656620 | 3.987831270  | -4.046375060 |
| C | -2.230376870 | 5.202915510  | -3.878384000 |
| H | -0.272975110 | 6.044192180  | -3.448696900 |
| C | 7.267745530  | 3.905534190  | 1.186072560  |
| C | -7.267745530 | -3.905534190 | -1.186072560 |
| C | 3.597481620  | -6.141870300 | 5.762402260  |
| C | 2.354956160  | -7.655409150 | 4.397371350  |
| C | -2.727145330 | 6.336715420  | -4.683660960 |
| C | 8.094296110  | 4.263608140  | 0.114498030  |
| C | 7.723540500  | 4.218826050  | 2.471953720  |
| C | -8.094296110 | -4.263608140 | -0.114498030 |
| C | -7.723540500 | -4.218826050 | -2.471953720 |
| H | 3.913770590  | -5.144031050 | 6.058899720  |
| C | 4.042365600  | -7.243636860 | 6.484943460  |
| C | 2.860642820  | -8.689240550 | 5.178036230  |
| H | 1.699355100  | -7.887863090 | 3.560806530  |
| C | -3.597481620 | 6.141870300  | -5.762402260 |
| C | -2.354956160 | 7.655409150  | -4.397371350 |
| H | 7.798116400  | 4.073885260  | -0.915031240 |
| C | 9.302674990  | 4.901971860  | 0.371172640  |
| C | 8.951592350  | 4.853698290  | 2.622318610  |
| H | 7.147627530  | 3.952176480  | 3.355628100  |
| H | -7.798116400 | -4.073885260 | 0.915031240  |
| C | -9.302674990 | -4.901971860 | -0.371172640 |
| C | -8.951592350 | -4.853698290 | -2.622318610 |
| H | -7.147627530 | -3.952176480 | -3.355628100 |
| N | 3.694194720  | -8.510867950 | 6.214113870  |
| H | 4.715597290  | -7.098204180 | 7.331301400  |
| H | 2.581877020  | -9.720340200 | 4.954390470  |
| H | -3.913770590 | 5.144031050  | -6.058899720 |
| C | -4.042365600 | 7.243636860  | -6.484943460 |
| C | -2.860642820 | 8.689240550  | -5.178036230 |
| H | -1.699355100 | 7.887863090  | -3.560806530 |
| N | 9.748324880  | 5.202203930  | 1.600591170  |
| H | 9.947853830  | 5.190618920  | -0.460227420 |

|   |              |              |              |
|---|--------------|--------------|--------------|
| H | 9.316668430  | 5.092570730  | 3.622549590  |
| N | -9.748324880 | -5.202203930 | -1.600591170 |
| H | -9.947853830 | -5.190618920 | 0.460227420  |
| H | -9.316668430 | -5.092570730 | -3.622549590 |
| N | -3.694194720 | 8.510867950  | -6.214113870 |
| H | -4.715597290 | 7.098204180  | -7.331301400 |
| H | -2.581877020 | 9.720340200  | -4.954390470 |

Table S2. The optimized coordinates of the  $[\text{Re}_6\text{S}_8\text{Cl}_2\text{bipy}_4]^n$  ( $n=2-; S=0$ ) cluster calculated at S12g/TZP/ZORA/DMSO level of theory.

|    |              |              |              |
|----|--------------|--------------|--------------|
| Re | 0.603397000  | -1.406137000 | 1.039026000  |
| Re | 1.592893000  | 0.885166000  | 0.271828000  |
| Re | -1.592920000 | -0.885149000 | -0.271838000 |
| Re | -0.708359000 | 0.808731000  | 1.505247000  |
| Re | 0.708341000  | -0.808739000 | -1.505299000 |
| S  | 2.688710000  | -1.221516000 | -0.175424000 |
| S  | -0.266867000 | -2.866310000 | -0.676584000 |
| S  | -1.573441000 | -1.374203000 | 2.095065000  |
| S  | 1.384250000  | 0.263099000  | 2.599629000  |
| N  | 1.307862000  | -3.057257000 | 2.256315000  |
| Re | -0.603354000 | 1.406098000  | -1.039020000 |
| S  | 0.266859000  | 2.866322000  | 0.676557000  |
| S  | 1.573429000  | 1.374220000  | -2.095089000 |
| N  | 3.475215000  | 1.916648000  | 0.579740000  |
| S  | -2.688719000 | 1.221523000  | 0.175410000  |
| S  | -1.384251000 | -0.263087000 | -2.599653000 |
| N  | -3.475242000 | -1.916620000 | -0.579740000 |
| Cl | -1.647946000 | 1.889043000  | 3.509480000  |
| Cl | 1.647921000  | -1.889049000 | -3.509523000 |
| C  | 2.504566000  | -3.014777000 | 2.901622000  |
| C  | 0.578973000  | -4.195858000 | 2.410444000  |
| N  | -1.307824000 | 3.057242000  | -2.256332000 |
| C  | 4.525031000  | 1.750093000  | -0.270121000 |
| C  | 3.676106000  | 2.755937000  | 1.630839000  |
| C  | -4.525060000 | -1.750060000 | 0.270121000  |
| C  | -3.676138000 | -2.755910000 | -1.630840000 |
| H  | 3.087150000  | -2.108412000 | 2.766936000  |
| C  | 2.982596000  | -4.047161000 | 3.676049000  |
| C  | 1.002415000  | -5.267696000 | 3.162294000  |
| H  | -0.382608000 | -4.217993000 | 1.906687000  |
| C  | -2.504525000 | 3.014759000  | -2.901638000 |
| C  | -0.578935000 | 4.195838000  | -2.410462000 |
| H  | 4.363661000  | 1.074117000  | -1.103987000 |
| C  | 5.736534000  | 2.381606000  | -0.105472000 |
| C  | 4.863816000  | 3.412882000  | 1.857104000  |
| H  | 2.832216000  | 2.891374000  | 2.300884000  |
| H  | -4.363689000 | -1.074084000 | 1.103988000  |
| C  | -5.736563000 | -2.381577000 | 0.105477000  |
| C  | -4.863849000 | -3.412856000 | -1.857101000 |
| H  | -2.832249000 | -2.891351000 | -2.300887000 |
| H  | 3.960499000  | -3.919716000 | 4.132945000  |
| C  | 2.242773000  | -5.240180000 | 3.838981000  |
| H  | 0.336031000  | -6.123195000 | 3.235314000  |

|   |               |              |              |
|---|---------------|--------------|--------------|
| H | -3.087108000  | 2.108394000  | -2.766953000 |
| C | -2.982561000  | 4.047146000  | -3.676059000 |
| C | -1.002377000  | 5.267678000  | -3.162313000 |
| H | 0.382646000   | 4.217974000  | -1.906706000 |
| H | 6.515908000   | 2.166501000  | -0.831862000 |
| C | 5.964457000   | 3.252120000  | 0.983438000  |
| H | 4.915295000   | 4.073732000  | 2.718377000  |
| H | -6.515934000  | -2.166472000 | 0.831870000  |
| C | -5.964488000  | -3.252095000 | -0.983430000 |
| H | -4.915328000  | -4.073705000 | -2.718374000 |
| C | 2.723370000   | -6.359602000 | 4.642160000  |
| H | -3.960466000  | 3.919703000  | -4.132951000 |
| C | -2.242737000  | 5.240163000  | -3.838990000 |
| H | -0.335993000  | 6.123177000  | -3.235336000 |
| C | 7.239380000   | 3.930215000  | 1.190084000  |
| C | -7.239409000  | -3.930199000 | -1.190069000 |
| C | 3.791810000   | -6.233324000 | 5.555915000  |
| C | 2.152829000   | -7.647966000 | 4.558131000  |
| C | -2.723342000  | 6.359590000  | -4.642164000 |
| C | 8.222275000   | 4.016687000  | 0.180143000  |
| C | 7.580247000   | 4.546369000  | 2.413706000  |
| C | -8.222313000  | -4.016647000 | -0.180134000 |
| C | -7.580262000  | -4.546392000 | -2.413676000 |
| H | 4.290816000   | -5.280152000 | 5.715780000  |
| C | 4.211091000   | -7.330204000 | 6.292611000  |
| C | 2.647813000   | -8.680689000 | 5.339130000  |
| H | 1.337084000   | -7.861882000 | 3.871332000  |
| C | -3.791774000  | 6.233307000  | -5.555925000 |
| C | -2.152814000  | 7.647957000  | -4.558116000 |
| H | 8.056512000   | 3.595004000  | -0.808606000 |
| C | 9.419030000   | 4.670462000  | 0.426916000  |
| C | 8.807915000   | 5.173355000  | 2.559564000  |
| H | 6.905115000   | 4.524210000  | 3.266195000  |
| H | -8.056565000  | -3.594930000 | 0.808602000  |
| C | -9.419061000  | -4.670441000 | -0.426896000 |
| C | -8.807923000  | -5.173395000 | -2.559524000 |
| H | -6.905125000  | -4.524254000 | -3.266162000 |
| N | 3.667937000   | -8.560821000 | 6.211309000  |
| H | 5.035412000   | -7.215973000 | 6.999655000  |
| H | 2.200585000   | -9.673705000 | 5.258350000  |
| H | -4.290768000  | 5.280131000  | -5.715803000 |
| C | -4.211063000  | 7.330191000  | -6.292611000 |
| C | -2.647807000  | 8.680684000  | -5.339107000 |
| H | -1.337077000  | 7.861873000  | -3.871309000 |
| N | 9.746103000   | 5.256005000  | 1.595845000  |
| H | 10.166589000  | 4.734402000  | -0.366671000 |
| H | 9.060206000   | 5.638641000  | 3.514827000  |
| N | -9.746117000  | -5.256029000 | -1.595808000 |
| H | -10.166625000 | -4.734361000 | 0.366686000  |
| H | -9.060201000  | -5.638714000 | -3.514775000 |
| N | -3.667923000  | 8.560812000  | -6.211292000 |
| H | -5.035380000  | 7.215959000  | -6.999661000 |
| H | -2.200590000  | 9.673703000  | -5.258314000 |

Table S3. The optimized coordinates of the  $[\text{Re}_6\text{S}_8\text{Cl}_2\text{bipy}_4]^n$  ( $n=2^-$ ;  $S=1$ ) cluster calculated at S12g/TZP/ZORA/DMSO level of theory.

|    |              |              |              |
|----|--------------|--------------|--------------|
| Re | 0.597408000  | -1.397963000 | 1.051809000  |
| Re | 1.593469000  | 0.883664000  | 0.267772000  |
| Re | -1.593469000 | -0.883664000 | -0.267772000 |
| Re | -0.709666000 | 0.823562000  | 1.497068000  |
| Re | 0.709666000  | -0.823562000 | -1.497068000 |
| S  | 2.684678000  | -1.231673000 | -0.155443000 |
| S  | -0.274350000 | -2.870967000 | -0.655720000 |
| S  | -1.578328000 | -1.355174000 | 2.103769000  |
| S  | 1.379663000  | 0.285494000  | 2.599733000  |
| N  | 1.298487000  | -3.042466000 | 2.281580000  |
| Re | -0.597408000 | 1.397963000  | -1.051809000 |
| S  | 0.274350000  | 2.870967000  | 0.655720000  |
| S  | 1.578328000  | 1.355174000  | -2.103769000 |
| N  | 3.476785000  | 1.916715000  | 0.582624000  |
| S  | -2.684678000 | 1.231673000  | 0.155443000  |
| S  | -1.379663000 | -0.285494000 | -2.599733000 |
| N  | -3.476785000 | -1.916715000 | -0.582624000 |
| Cl | -1.653971000 | 1.920861000  | 3.488891000  |
| Cl | 1.653971000  | -1.920861000 | -3.488891000 |
| C  | 2.525570000  | -3.027247000 | 2.869396000  |
| C  | 0.541752000  | -4.154024000 | 2.491017000  |
| N  | -1.298487000 | 3.042466000  | -2.281580000 |
| C  | 4.533262000  | 1.746507000  | -0.257488000 |
| C  | 3.668393000  | 2.761324000  | 1.631474000  |
| C  | -4.533262000 | -1.746507000 | 0.257488000  |
| C  | -3.668393000 | -2.761324000 | -1.631474000 |
| H  | 3.126407000  | -2.139433000 | 2.696498000  |
| C  | 3.009533000  | -4.063444000 | 3.634566000  |
| C  | 0.968992000  | -5.228485000 | 3.236679000  |
| H  | -0.442354000 | -4.154317000 | 2.032117000  |
| C  | -2.525570000 | 3.027247000  | -2.869396000 |
| C  | -0.541752000 | 4.154024000  | -2.491017000 |
| H  | 4.378419000  | 1.066230000  | -1.089292000 |
| C  | 5.743140000  | 2.378781000  | -0.086680000 |
| C  | 4.854638000  | 3.419019000  | 1.864425000  |
| H  | 2.818997000  | 2.900641000  | 2.293544000  |
| H  | -4.378419000 | -1.066230000 | 1.089292000  |
| C  | -5.743140000 | -2.378781000 | 0.086680000  |
| C  | -4.854638000 | -3.419019000 | -1.864425000 |
| H  | -2.818997000 | -2.900641000 | -2.293544000 |
| H  | 4.011208000  | -3.960164000 | 4.043808000  |
| C  | 2.243256000  | -5.231872000 | 3.848834000  |
| H  | 0.282493000  | -6.062910000 | 3.354460000  |
| H  | -3.126407000 | 2.139433000  | -2.696498000 |
| C  | -3.009533000 | 4.063444000  | -3.634566000 |
| C  | -0.968992000 | 5.228485000  | -3.236679000 |
| H  | 0.442354000  | 4.154317000  | -2.032117000 |
| H  | 6.528771000  | 2.160596000  | -0.805317000 |
| C  | 5.961783000  | 3.254655000  | 1.000865000  |
| H  | 4.899413000  | 4.084249000  | 2.722783000  |

|   |               |              |              |
|---|---------------|--------------|--------------|
| H | -6.528771000  | -2.160596000 | 0.805317000  |
| C | -5.961783000  | -3.254655000 | -1.000865000 |
| H | -4.899413000  | -4.084249000 | -2.722783000 |
| C | 2.732579000   | -6.358412000 | 4.635538000  |
| H | -4.011208000  | 3.960164000  | -4.043808000 |
| C | -2.243256000  | 5.231872000  | -3.848834000 |
| H | -0.282493000  | 6.062910000  | -3.354460000 |
| C | 7.234400000   | 3.934972000  | 1.214688000  |
| C | -7.234400000  | -3.934972000 | -1.214688000 |
| C | 3.832103000   | -6.249052000 | 5.514062000  |
| C | 2.141330000   | -7.638456000 | 4.567887000  |
| C | -2.732579000  | 6.358412000  | -4.635538000 |
| C | 8.220479000   | 4.026526000  | 0.208642000  |
| C | 7.568962000   | 4.547656000  | 2.441530000  |
| C | -8.220479000  | -4.026526000 | -0.208642000 |
| C | -7.568962000  | -4.547656000 | -2.441530000 |
| H | 4.348376000   | -5.302595000 | 5.659059000  |
| C | 4.259664000   | -7.353338000 | 6.234668000  |
| C | 2.648059000   | -8.680058000 | 5.329154000  |
| H | 1.301113000   | -7.838736000 | 3.906719000  |
| C | -3.832103000  | 6.249052000  | -5.514062000 |
| C | -2.141330000  | 7.638456000  | -4.567887000 |
| H | 8.058802000   | 3.607783000  | -0.782068000 |
| C | 9.414757000   | 4.682600000  | 0.461880000  |
| C | 8.794601000   | 5.176988000  | 2.594036000  |
| H | 6.890556000   | 4.520422000  | 3.291321000  |
| H | -8.058802000  | -3.607783000 | 0.782068000  |
| C | -9.414757000  | -4.682600000 | -0.461880000 |
| C | -8.794601000  | -5.176988000 | -2.594036000 |
| H | -6.890556000  | -4.520422000 | -3.291321000 |
| N | 3.697564000   | -8.576393000 | 6.168025000  |
| H | 5.107438000   | -7.252168000 | 6.915489000  |
| H | 2.185521000   | -9.666939000 | 5.260176000  |
| H | -4.348376000  | 5.302595000  | -5.659059000 |
| C | -4.259664000  | 7.353338000  | -6.234668000 |
| C | -2.648059000  | 8.680058000  | -5.329154000 |
| H | -1.301113000  | 7.838736000  | -3.906719000 |
| N | 9.735892000   | 5.264960000  | 1.633805000  |
| H | 10.165024000  | 4.751230000  | -0.328748000 |
| H | 9.042615000   | 5.639462000  | 3.551766000  |
| N | -9.735892000  | -5.264960000 | -1.633805000 |
| H | -10.165024000 | -4.751230000 | 0.328748000  |
| H | -9.042615000  | -5.639462000 | -3.551766000 |
| N | -3.697564000  | 8.576393000  | -6.168025000 |
| H | -5.107438000  | 7.252168000  | -6.915489000 |
| H | -2.185521000  | 9.666939000  | -5.260176000 |

Table S4. The optimized coordinates of the  $[\text{Re}_6\text{S}_8\text{Cl}_2\text{bipy}_4]^n$  ( $n=4^-$ ;  $S=0$ ) cluster calculated at S12g/TZP/ZORA/DMSO level of theory.

|    |              |              |              |
|----|--------------|--------------|--------------|
| Re | 0.581375000  | -1.408903000 | 1.089525000  |
| Re | 1.593298000  | 0.886181000  | 0.323407000  |
| Re | -1.614317000 | -0.863138000 | -0.229749000 |
| Re | -0.714103000 | 0.824372000  | 1.550103000  |

|    |              |              |              |
|----|--------------|--------------|--------------|
| Re | 0.693559000  | -0.801588000 | -1.457137000 |
| S  | 2.669943000  | -1.233460000 | -0.125186000 |
| S  | -0.300847000 | -2.853250000 | -0.641799000 |
| S  | -1.598778000 | -1.351672000 | 2.141143000  |
| S  | 1.370913000  | 0.264800000  | 2.651546000  |
| N  | 1.259885000  | -3.053717000 | 2.278507000  |
| Re | -0.601336000 | 1.430412000  | -0.998024000 |
| S  | 0.278154000  | 2.876611000  | 0.731892000  |
| S  | 1.580217000  | 1.372977000  | -2.047602000 |
| N  | 3.448147000  | 1.907825000  | 0.642516000  |
| S  | -2.690012000 | 1.257643000  | 0.216562000  |
| S  | -1.390932000 | -0.244766000 | -2.558339000 |
| N  | -3.471858000 | -1.879758000 | -0.549884000 |
| Cl | -1.658587000 | 1.919282000  | 3.568646000  |
| Cl | 1.638328000  | -1.896533000 | -3.475560000 |
| C  | 2.503038000  | -3.087931000 | 2.854219000  |
| C  | 0.485469000  | -4.165306000 | 2.488364000  |
| N  | -1.276249000 | 3.063394000  | -2.204613000 |
| C  | 4.512921000  | 1.769654000  | -0.208297000 |
| C  | 3.642345000  | 2.766139000  | 1.692239000  |
| C  | -4.538253000 | -1.734174000 | 0.297811000  |
| C  | -3.670837000 | -2.732353000 | -1.603326000 |
| H  | 3.117268000  | -2.205000000 | 2.700791000  |
| C  | 2.978431000  | -4.150398000 | 3.579315000  |
| C  | 0.900355000  | -5.259886000 | 3.201457000  |
| H  | -0.505364000 | -4.139787000 | 2.044077000  |
| C  | -2.506218000 | 3.078741000  | -2.808622000 |
| C  | -0.496853000 | 4.167999000  | -2.432080000 |
| H  | 4.368568000  | 1.083992000  | -1.038185000 |
| C  | 5.700325000  | 2.438696000  | -0.058076000 |
| C  | 4.804598000  | 3.463592000  | 1.901179000  |
| H  | 2.804047000  | 2.874368000  | 2.374485000  |
| H  | -4.389026000 | -1.055491000 | 1.132542000  |
| C  | -5.733373000 | -2.387004000 | 0.138115000  |
| C  | -4.840646000 | -3.414197000 | -1.821401000 |
| H  | -2.830070000 | -2.849068000 | -2.281125000 |
| H  | 3.983574000  | -4.059465000 | 3.984125000  |
| C  | 2.196792000  | -5.324677000 | 3.793152000  |
| H  | 0.194485000  | -6.081574000 | 3.295423000  |
| H  | -3.128828000 | 2.206335000  | -2.630947000 |
| C  | -2.957405000 | 4.109133000  | -3.592971000 |
| C  | -0.887725000 | 5.230822000  | -3.204396000 |
| H  | 0.479216000  | 4.161788000  | -1.955577000 |
| H  | 6.470782000  | 2.245646000  | -0.800633000 |
| C  | 5.919800000  | 3.346657000  | 1.019726000  |
| H  | 4.837125000  | 4.116610000  | 2.769992000  |
| H  | -6.504666000 | -2.188915000 | 0.878488000  |
| C  | -5.959962000 | -3.284691000 | -0.946841000 |
| H  | -4.876509000 | -4.064025000 | -2.692470000 |
| C  | 2.670914000  | -6.466903000 | 4.528396000  |
| H  | -3.953040000 | 4.004764000  | -4.017515000 |
| C  | -2.162624000 | 5.267260000  | -3.843336000 |
| H  | -0.179153000 | 6.048832000  | -3.309414000 |

|   |               |              |              |
|---|---------------|--------------|--------------|
| C | 7.148112000   | 4.075275000  | 1.199285000  |
| C | -7.198753000  | -3.991292000 | -1.139947000 |
| C | 3.964928000   | -6.531505000 | 5.121220000  |
| C | 1.891095000   | -7.642529000 | 4.728245000  |
| C | -2.603296000  | 6.365929000  | -4.661076000 |
| C | 8.254155000   | 3.968401000  | 0.307813000  |
| C | 7.370112000   | 4.973917000  | 2.282142000  |
| C | -8.309043000  | -3.872274000 | -0.255242000 |
| C | -7.428887000  | -4.877103000 | -2.231729000 |
| H | 4.662656000   | -5.700134000 | 5.045750000  |
| C | 4.373096000   | -7.657940000 | 5.809763000  |
| C | 2.396732000   | -8.716391000 | 5.435707000  |
| H | 0.882865000   | -7.726372000 | 4.328123000  |
| C | -3.873592000  | 6.398592000  | -5.305466000 |
| C | -1.809182000  | 7.523963000  | -4.903131000 |
| H | 8.216542000   | 3.317931000  | -0.563405000 |
| C | 9.410867000   | 4.692865000  | 0.524559000  |
| C | 8.568580000   | 5.650997000  | 2.405969000  |
| H | 6.605679000   | 5.149319000  | 3.036177000  |
| H | -8.266121000  | -3.229544000 | 0.621472000  |
| C | -9.476799000  | -4.574207000 | -0.486120000 |
| C | -8.638218000  | -5.531696000 | -2.369612000 |
| H | -6.662387000  | -5.059292000 | -2.982079000 |
| N | 3.629100000   | -8.774693000 | 5.994952000  |
| H | 5.372964000   | -7.674964000 | 6.251254000  |
| H | 1.771933000   | -9.603448000 | 5.569136000  |
| H | -4.579383000  | 5.576858000  | -5.204203000 |
| C | -4.246139000  | 7.478985000  | -6.082275000 |
| C | -2.279321000  | 8.551629000  | -5.698263000 |
| H | -0.816795000  | 7.629051000  | -4.469726000 |
| N | 9.617950000   | 5.545671000  | 1.556165000  |
| H | 10.240635000  | 4.588330000  | -0.179238000 |
| H | 8.706324000   | 6.333533000  | 3.248538000  |
| N | -9.691653000  | -5.414714000 | -1.526271000 |
| H | -10.309646000 | -4.460665000 | 0.212624000  |
| H | -8.782130000  | -6.204562000 | -3.218910000 |
| N | -3.487486000  | 8.577775000  | -6.310092000 |
| H | -5.227602000  | 7.471511000  | -6.563463000 |
| H | -1.644195000  | 9.425891000  | -5.863284000 |

Table S5. The optimized coordinates of the  $[\text{Re}_6\text{S}_8\text{Cl}_2\text{bipy}_4]^n$  ( $n=4^-$ ;  $S=1$ ) cluster calculated at S12g/TZP/ZORA/DMSO level of theory.

|    |              |              |              |
|----|--------------|--------------|--------------|
| Re | 0.613519920  | -1.410750910 | 1.034677760  |
| Re | 1.592957290  | 0.896945480  | 0.277739240  |
| Re | -1.592957290 | -0.896945480 | -0.277739240 |
| Re | -0.712010290 | 0.796134620  | 1.507073250  |
| Re | 0.712010290  | -0.796134620 | -1.507073250 |
| S  | 2.696232600  | -1.207721570 | -0.181873340 |
| S  | -0.249987720 | -2.866126200 | -0.696402480 |
| S  | -1.564791400 | -1.394817880 | 2.090944640  |
| S  | 1.381621370  | 0.264932770  | 2.603775370  |
| N  | 1.325446750  | -3.045986580 | 2.233128200  |
| Re | -0.613519920 | 1.410750910  | -1.034677760 |



|    |              |              |              |
|----|--------------|--------------|--------------|
| S  | 0.249987720  | 2.866126200  | 0.696402480  |
| S  | 1.564791400  | 1.394817880  | -2.090944640 |
| N  | 3.442927370  | 1.924691800  | 0.598499220  |
| S  | -2.696232600 | 1.207721570  | 0.181873340  |
| S  | -1.381621370 | -0.264932770 | -2.603775370 |
| N  | -3.442927370 | -1.924691800 | -0.598499220 |
| Cl | -1.669973040 | 1.870660530  | 3.536024260  |
| Cl | 1.669973040  | -1.870660530 | -3.536024260 |
| C  | 2.563692500  | -3.036509250 | 2.819987080  |
| C  | 0.579779950  | -4.174745990 | 2.451518040  |
| N  | -1.325446750 | 3.045986580  | -2.233128200 |
| C  | 4.516851700  | 1.771532810  | -0.238404960 |
| C  | 3.642612590  | 2.762933440  | 1.663465260  |
| C  | -4.516851700 | -1.771532810 | 0.238404960  |
| C  | -3.642612590 | -2.762933440 | -1.663465260 |
| H  | 3.157441220  | -2.142131440 | 2.653104250  |
| C  | 3.057723390  | -4.068748280 | 3.574284470  |
| C  | 1.013579560  | -5.242757950 | 3.193326670  |
| H  | -0.404868160 | -4.184459990 | 1.992381060  |
| C  | -2.563692500 | 3.036509250  | -2.819987080 |
| C  | -0.579779950 | 4.174745990  | -2.451518040 |
| H  | 4.364104440  | 1.112350810  | -1.087873750 |
| C  | 5.724793920  | 2.391800310  | -0.048764780 |
| C  | 4.824840140  | 3.412627320  | 1.910607030  |
| H  | 2.792891770  | 2.892464690  | 2.327683120  |
| H  | -4.364104440 | -1.112350810 | 1.087873750  |
| C  | -5.724793920 | -2.391800310 | 0.048764780  |
| C  | -4.824840140 | -3.412627320 | -1.910607030 |
| H  | -2.792891770 | -2.892464690 | -2.327683120 |
| H  | 4.056081580  | -3.943540940 | 3.986564440  |
| C  | 2.302359990  | -5.257860010 | 3.808909280  |
| H  | 0.329830280  | -6.082156940 | 3.294545560  |
| H  | -3.157441220 | 2.142131440  | -2.653104250 |
| C  | -3.057723390 | 4.068748280  | -3.574284470 |
| C  | -1.013579560 | 5.242757950  | -3.193326670 |
| H  | 0.404868160  | 4.184459990  | -1.992381060 |
| H  | 6.501730990  | 2.189733770  | -0.782126590 |
| C  | 5.957797740  | 3.260624330  | 1.057798910  |
| H  | 4.861039640  | 4.051684190  | 2.789625220  |
| H  | -6.501730990 | -2.189733770 | 0.782126590  |
| C  | -5.957797740 | -3.260624330 | -1.057798910 |
| H  | -4.861039640 | -4.051684190 | -2.789625220 |
| C  | 2.793539530  | -6.361806650 | 4.587264170  |
| H  | -4.056081580 | 3.943540940  | -3.986564440 |
| C  | -2.302359990 | 5.257860010  | -3.808909280 |
| H  | -0.329830280 | 6.082156940  | -3.294545560 |
| C  | 7.216138430  | 3.919375030  | 1.290974460  |
| C  | -7.216138430 | -3.919375030 | -1.290974460 |
| C  | 4.074677770  | -6.366797140 | 5.212425890  |
| C  | 2.046162820  | -7.555520600 | 4.806962890  |
| C  | -2.793539530 | 6.361806650  | -4.587264170 |
| C  | 8.344124500  | 3.766982340  | 0.434632890  |
| C  | 7.450513310  | 4.782737560  | 2.399381700  |

|   |               |              |              |
|---|---------------|--------------|--------------|
| C | -8.344124500  | -3.766982340 | -0.434632890 |
| C | -7.450513310  | -4.782737560 | -2.399381700 |
| H | 4.748153580   | -5.516745800 | 5.126030750  |
| C | 4.499167860   | -7.454987820 | 5.949860160  |
| C | 2.566555420   | -8.588307400 | 5.562903760  |
| H | 1.051604680   | -7.683990280 | 4.384738740  |
| C | -4.074677770  | 6.366797140  | -5.212425890 |
| C | -2.046162820  | 7.555520600  | -4.806962890 |
| H | 8.300743930   | 3.134050270  | -0.449150970 |
| C | 9.530818540   | 4.421695590  | 0.704006740  |
| C | 8.679448300   | 5.389937910  | 2.576270670  |
| H | 6.671865030   | 4.984739460  | 3.131954120  |
| H | -8.300743930  | -3.134050270 | 0.449150970  |
| C | -9.530818540  | -4.421695590 | -0.704006740 |
| C | -8.679448300  | -5.389937910 | -2.576270670 |
| H | -6.671865030  | -4.984739460 | -3.131954120 |
| N | 3.785174270   | -8.588280460 | 6.155507820  |
| H | 5.487198280   | -7.425234900 | 6.416614540  |
| H | 1.966948990   | -9.490382790 | 5.710697760  |
| H | -4.748153580  | 5.516745800  | -5.126030750 |
| C | -4.499167860  | 7.454987820  | -5.949860160 |
| C | -2.566555420  | 8.588307400  | -5.562903760 |
| H | -1.051604680  | 7.683990280  | -4.384738740 |
| N | 9.749244730   | 5.242478930  | 1.758907850  |
| H | 10.377397040  | 4.283279870  | 0.026562050  |
| H | 8.826468010   | 6.046882050  | 3.437403220  |
| N | -9.749244730  | -5.242478930 | -1.758907850 |
| H | -10.377397040 | -4.283279870 | -0.026562050 |
| H | -8.826468010  | -6.046882050 | -3.437403220 |
| N | -3.785174270  | 8.588280460  | -6.155507820 |
| H | -5.487198280  | 7.425234900  | -6.416614540 |
| H | -1.966948990  | 9.490382790  | -5.710697760 |

Table S6. The optimized coordinates of the  $[\text{Re}_4\text{S}_8\text{Cl}_2\text{bipy}_4]^n$  ( $n=4^-$ ;  $S=2$ ) cluster calculated at S12g/TZP/ZORA/DMSO level of theory.

|    |              |              |              |
|----|--------------|--------------|--------------|
| Re | 0.613649000  | -1.409796000 | 1.032300000  |
| Re | 1.586870000  | 0.895722000  | 0.279310000  |
| Re | -1.586870000 | -0.895722000 | -0.279310000 |
| Re | -0.714725000 | 0.794035000  | 1.508645000  |
| Re | 0.714725000  | -0.794035000 | -1.508645000 |
| S  | 2.697899000  | -1.203475000 | -0.180318000 |
| S  | -0.246950000 | -2.865290000 | -0.699582000 |
| S  | -1.564744000 | -1.399922000 | 2.087046000  |
| S  | 1.379927000  | 0.263195000  | 2.604445000  |
| N  | 1.327424000  | -3.048100000 | 2.230573000  |
| Re | -0.613649000 | 1.409796000  | -1.032300000 |
| S  | 0.246950000  | 2.865290000  | 0.699582000  |
| S  | 1.564744000  | 1.399922000  | -2.087046000 |
| N  | 3.446144000  | 1.931693000  | 0.604708000  |
| S  | -2.697899000 | 1.203475000  | 0.180318000  |
| S  | -1.379927000 | -0.263195000 | -2.604445000 |
| N  | -3.446144000 | -1.931693000 | -0.604708000 |
| Cl | -1.674568000 | 1.863395000  | 3.535624000  |

|    |              |              |              |
|----|--------------|--------------|--------------|
| Cl | 1.674568000  | -1.863395000 | -3.535624000 |
| C  | 2.565221000  | -3.037993000 | 2.818384000  |
| C  | 0.582087000  | -4.177365000 | 2.447609000  |
| N  | -1.327424000 | 3.048100000  | -2.230573000 |
| C  | 4.520589000  | 1.779301000  | -0.230739000 |
| C  | 3.643807000  | 2.767184000  | 1.671466000  |
| C  | -4.520589000 | -1.779301000 | 0.230739000  |
| C  | -3.643807000 | -2.767184000 | -1.671466000 |
| H  | 3.158893000  | -2.143346000 | 2.652615000  |
| C  | 3.059060000  | -4.070320000 | 3.572611000  |
| C  | 1.015908000  | -5.245327000 | 3.189368000  |
| H  | -0.402165000 | -4.187874000 | 1.987634000  |
| C  | -2.565221000 | 3.037993000  | -2.818384000 |
| C  | -0.582087000 | 4.177365000  | -2.447609000 |
| H  | 4.368795000  | 1.121344000  | -1.081552000 |
| C  | 5.728235000  | 2.398596000  | -0.039466000 |
| C  | 4.824739000  | 3.416876000  | 1.922207000  |
| H  | 2.792887000  | 2.895218000  | 2.334745000  |
| H  | -4.368795000 | -1.121344000 | 1.081552000  |
| C  | -5.728235000 | -2.398596000 | 0.039466000  |
| C  | -4.824739000 | -3.416876000 | -1.922207000 |
| H  | -2.792887000 | -2.895218000 | -2.334745000 |
| H  | 4.056989000  | -3.944792000 | 3.985782000  |
| C  | 2.304035000  | -5.259752000 | 3.806078000  |
| H  | 0.332627000  | -6.085206000 | 3.289523000  |
| H  | -3.158893000 | 2.143346000  | -2.652615000 |
| C  | -3.059060000 | 4.070320000  | -3.572611000 |
| C  | -1.015908000 | 5.245327000  | -3.189368000 |
| H  | 0.402165000  | 4.187874000  | -1.987634000 |
| H  | 6.505989000  | 2.197644000  | -0.772307000 |
| C  | 5.961007000  | 3.267147000  | 1.069982000  |
| H  | 4.859331000  | 4.054391000  | 2.802451000  |
| H  | -6.505989000 | -2.197644000 | 0.772307000  |
| C  | -5.961007000 | -3.267147000 | -1.069982000 |
| H  | -4.859331000 | -4.054391000 | -2.802451000 |
| C  | 2.795091000  | -6.363842000 | 4.584695000  |
| H  | -4.056989000 | 3.944792000  | -3.985782000 |
| C  | -2.304035000 | 5.259752000  | -3.806078000 |
| H  | -0.332627000 | 6.085206000  | -3.289523000 |
| C  | 7.216915000  | 3.925020000  | 1.305295000  |
| C  | -7.216915000 | -3.925020000 | -1.305295000 |
| C  | 4.075595000  | -6.368299000 | 5.210748000  |
| C  | 2.047919000  | -7.557653000 | 4.803417000  |
| C  | -2.795091000 | 6.363842000  | -4.584695000 |
| C  | 8.347329000  | 3.775090000  | 0.449849000  |
| C  | 7.450842000  | 4.787633000  | 2.415834000  |
| C  | -8.347329000 | -3.775090000 | -0.449849000 |
| C  | -7.450842000 | -4.787633000 | -2.415834000 |
| H  | 4.748790000  | -5.517977000 | 5.125023000  |
| C  | 4.499899000  | -7.456500000 | 5.948390000  |
| C  | 2.568066000  | -8.590444000 | 5.559627000  |
| H  | 1.053755000  | -7.686348000 | 4.380376000  |
| C  | -4.075595000 | 6.368299000  | -5.210748000 |

|   |               |              |              |
|---|---------------|--------------|--------------|
| C | -2.047919000  | 7.557653000  | -4.803417000 |
| H | 8.305400000   | 3.143548000  | -0.435111000 |
| C | 9.532842000   | 4.429833000  | 0.721463000  |
| C | 8.678793000   | 5.394932000  | 2.594760000  |
| H | 6.671367000   | 4.988213000  | 3.148036000  |
| H | -8.305400000  | -3.143548000 | 0.435111000  |
| C | -9.532842000  | -4.429833000 | -0.721463000 |
| C | -8.678793000  | -5.394932000 | -2.594760000 |
| H | -6.671367000  | -4.988213000 | -3.148036000 |
| N | 3.786097000   | -8.589922000 | 6.153137000  |
| H | 5.487508000   | -7.426516000 | 6.415981000  |
| H | 1.968704000   | -9.492763000 | 5.706802000  |
| H | -4.748790000  | 5.517977000  | -5.125023000 |
| C | -4.499899000  | 7.456500000  | -5.948390000 |
| C | -2.568066000  | 8.590444000  | -5.559627000 |
| H | -1.053755000  | 7.686348000  | -4.380376000 |
| N | 9.750541000   | 5.249722000  | 1.778234000  |
| H | 10.380231000  | 4.292892000  | 0.044596000  |
| H | 8.824497000   | 6.050682000  | 3.457136000  |
| N | -9.750541000  | -5.249722000 | -1.778234000 |
| H | -10.380231000 | -4.292892000 | -0.044596000 |
| H | -8.824497000  | -6.050682000 | -3.457136000 |
| N | -3.786097000  | 8.589922000  | -6.153137000 |
| H | -5.487508000  | 7.426516000  | -6.415981000 |
| H | -1.968704000  | 9.492763000  | -5.706802000 |

Table S7. The optimized coordinates of the  $[\text{Re}_6\text{S}_8\text{Cl}_2\text{bipy}_4]^n$  ( $n=6^-$ ;  $S=0$ ) cluster calculated at S12g/TZP/ZORA/DMSO level of theory.

|    |              |              |              |
|----|--------------|--------------|--------------|
| Re | 0.586510650  | -1.385442480 | 1.107989470  |
| Re | 1.589376360  | 0.891777010  | 0.267329680  |
| Re | -1.603436860 | -0.901091140 | -0.259532270 |
| Re | -0.733033270 | 0.856077210  | 1.468886710  |
| Re | 0.718391690  | -0.865874600 | -1.461196130 |
| S  | 2.681894800  | -1.241514910 | -0.095342930 |
| S  | -0.265360640 | -2.896954140 | -0.582368310 |
| S  | -1.620079600 | -1.299352710 | 2.127445290  |
| S  | 1.346034240  | 0.363016810  | 2.614937660  |
| N  | 1.236220990  | -2.933345730 | 2.404774410  |
| Re | -0.599770360 | 1.376368970  | -1.100153790 |
| S  | 0.251152550  | 2.886890440  | 0.592053640  |
| S  | 1.606648970  | 1.288774090  | -2.120029970 |
| N  | 3.426765890  | 1.918143360  | 0.570155440  |
| S  | -2.696086230 | 1.232618710  | 0.101472980  |
| S  | -1.360573060 | -0.370754500 | -2.607290840 |
| N  | -3.442269150 | -1.925771190 | -0.562971170 |
| Cl | -1.718522570 | 2.024428560  | 3.461120380  |
| Cl | 1.702433730  | -2.034996780 | -3.453635700 |
| C  | 2.505133350  | -2.962317670 | 2.948512920  |
| C  | 0.488644020  | -4.071575110 | 2.633951230  |
| N  | -1.239112880 | 2.934004410  | -2.389545160 |
| C  | 4.521189140  | 1.738783750  | -0.246686550 |
| C  | 3.623080680  | 2.797607260  | 1.611832480  |
| C  | -4.536378680 | -1.743649910 | 0.253911760  |

|   |              |              |              |
|---|--------------|--------------|--------------|
| C | -3.641020590 | -2.804604130 | -1.604818890 |
| H | 3.097618380  | -2.064173190 | 2.793136130  |
| C | 3.019647530  | -4.020516940 | 3.644261600  |
| C | 0.940497790  | -5.162400230 | 3.322756350  |
| H | -0.518515990 | -4.055689980 | 2.225110660  |
| C | -2.500043630 | 2.963539340  | -2.951274540 |
| C | -0.487884390 | 4.071899010  | -2.608051150 |
| H | 4.378570560  | 1.049431530  | -1.074519510 |
| C | 5.725091610  | 2.362424000  | -0.065042190 |
| C | 4.801543620  | 3.448080030  | 1.855914110  |
| H | 2.763106230  | 2.957397260  | 2.256706430  |
| H | -4.391723950 | -1.055613180 | 1.082479570  |
| C | -5.742276500 | -2.363082900 | 0.071551000  |
| C | -4.821624200 | -3.451044770 | -1.849561500 |
| H | -2.781180700 | -2.966972130 | -2.249321240 |
| H | 4.031892270  | -3.908817770 | 4.029054850  |
| C | 2.267951560  | -5.226804480 | 3.878321440  |
| H | 0.244313560  | -5.991073200 | 3.439869970  |
| H | -3.096038570 | 2.066615510  | -2.802061360 |
| C | -3.003208130 | 4.020645320  | -3.656924370 |
| C | -0.929652610 | 5.162906050  | -3.302819650 |
| H | 0.513427220  | 4.055712080  | -2.185273500 |
| H | 6.508608620  | 2.134887390  | -0.785447990 |
| C | 5.960697990  | 3.272780840  | 1.023139290  |
| H | 4.824457000  | 4.115387270  | 2.715439620  |
| H | -6.525060880 | -2.133630060 | 0.792128700  |
| C | -5.980873380 | -3.271581830 | -1.017590530 |
| H | -4.846403430 | -4.118126470 | -2.709223100 |
| C | 2.775109890  | -6.347187830 | 4.583352540  |
| H | -4.010212450 | 3.909278660  | -4.055340680 |
| C | -2.247544230 | 5.226543560  | -3.880834740 |
| H | -0.231502740 | 5.991326250  | -3.409488940 |
| C | 7.201190800  | 3.927258870  | 1.249937700  |
| C | -7.224039370 | -3.920427120 | -1.245586950 |
| C | 4.106915830  | -6.416665920 | 5.124080410  |
| C | 2.017122590  | -7.543718870 | 4.837762180  |
| C | -2.742265360 | 6.346026690  | -4.595766580 |
| C | 8.358864940  | 3.751173500  | 0.417168220  |
| C | 7.436829990  | 4.836034330  | 2.337893120  |
| C | -8.381947910 | -3.738536130 | -0.414221810 |
| C | -7.462849070 | -4.828448340 | -2.333541140 |
| H | 4.801720590  | -5.586206070 | 5.007449530  |
| C | 4.549591470  | -7.533463090 | 5.798744660  |
| C | 2.561591470  | -8.604168000 | 5.528977790  |
| H | 0.989907390  | -7.639761240 | 4.488862350  |
| C | -4.058447080 | 6.409053890  | -5.174451290 |
| C | -1.985040040 | 7.548210040  | -4.825016410 |
| H | 8.331412040  | 3.089909520  | -0.447524220 |
| C | 9.539390760  | 4.410384860  | 0.684244520  |
| C | 8.662516530  | 5.442405330  | 2.511179040  |
| H | 6.650282000  | 5.067793230  | 3.054458350  |
| H | -8.352573440 | -3.076843750 | 0.450090870  |
| C | -9.565163580 | -4.392446550 | -0.682241950 |

|   |               |              |              |
|---|---------------|--------------|--------------|
| C | -8.691099070  | -5.429349060 | -2.507758110 |
| H | -6.676599720  | -5.064308390 | -3.049087080 |
| N | 3.825240540   | -8.663234060 | 6.036253010  |
| H | 5.572047780   | -7.539480360 | 6.188924200  |
| H | 1.944599080   | -9.492025170 | 5.698397560  |
| H | -4.750237350  | 5.572949720  | -5.082899140 |
| C | -4.488702220  | 7.525301480  | -5.857852360 |
| C | -2.516788190  | 8.608014310  | -5.526866540 |
| H | -0.969096820  | 7.650213590  | -4.446018400 |
| N | 9.755783830   | 5.270540870  | 1.717560280  |
| H | 10.394580980  | 4.244998620  | 0.022020280  |
| H | 8.795387010   | 6.126833460  | 3.354416250  |
| N | -9.784444560  | -5.252147390 | -1.715375370 |
| H | -10.420337260 | -4.222685320 | -0.021093540 |
| H | -8.826233890  | -6.113552170 | -3.350822690 |
| N | -3.765663050  | 8.660926500  | -6.070144630 |
| H | -5.499005070  | 7.525385260  | -6.278637380 |
| H | -1.901065800  | 9.500661190  | -5.674764360 |

Table S8. The optimized coordinates of the  $[\text{Re}_6\text{S}_8\text{Cl}_2\text{bipy}_4]^n$  ( $n=6^-$ ;  $S=1$ ) cluster calculated at S12g/TZP/ZORA/DMSO level of theory.

|    |              |              |              |
|----|--------------|--------------|--------------|
| Re | 0.597676920  | -1.398348580 | 1.083738420  |
| Re | 1.596109050  | 0.890954520  | 0.269151380  |
| Re | -1.600455890 | -0.896114670 | -0.263808900 |
| Re | -0.719100850 | 0.837491840  | 1.483484290  |
| Re | 0.714653100  | -0.842884430 | -1.478215750 |
| S  | 2.689092450  | -1.232766680 | -0.131971530 |
| S  | -0.267573170 | -2.886331720 | -0.625302790 |
| S  | -1.595602030 | -1.328751340 | 2.120114560  |
| S  | 1.363980090  | 0.322886200  | 2.611115850  |
| N  | 1.281598520  | -2.990762140 | 2.310111600  |
| Re | -0.601548690 | 1.393063860  | -1.078482530 |
| S  | 0.262970590  | 2.880840320  | 0.630985410  |
| S  | 1.591814760  | 1.323199070  | -2.114815480 |
| N  | 3.434715010  | 1.913358750  | 0.574539840  |
| S  | -2.693362780 | 1.227942400  | 0.136470360  |
| S  | -1.368317940 | -0.327915450 | -2.605703470 |
| N  | -3.439989830 | -1.917304030 | -0.568868140 |
| Cl | -1.691705640 | 1.979952310  | 3.494102520  |
| Cl | 1.686678740  | -1.985674850 | -3.488936830 |
| C  | 2.536855610  | -3.004102930 | 2.882367330  |
| C  | 0.523600310  | -4.116017620 | 2.561274620  |
| N  | -1.281891070 | 2.986562260  | -2.304970750 |
| C  | 4.527190550  | 1.740686930  | -0.247670990 |
| C  | 3.636021130  | 2.784216060  | 1.623397700  |
| C  | -4.532708760 | -1.742047680 | 0.252557370  |
| C  | -3.642668400 | -2.787552460 | -1.617991740 |
| H  | 3.136571060  | -2.114162340 | 2.709587280  |
| C  | 3.033995990  | -4.042418370 | 3.619980700  |
| C  | 0.957860970  | -5.187020200 | 3.291919800  |
| H  | -0.474260240 | -4.110266650 | 2.130214750  |
| C  | -2.531924500 | 2.997691220  | -2.888417190 |
| C  | -0.524543710 | 4.114174840  | -2.547342120 |

|   |              |              |              |
|---|--------------|--------------|--------------|
| H | 4.380837650  | 1.060624290  | -1.082555540 |
| C | 5.732174710  | 2.360761490  | -0.064310100 |
| C | 4.813611550  | 3.435999890  | 1.865866750  |
| H | 2.780191030  | 2.934305180  | 2.276253190  |
| H | -4.385095450 | -1.063150590 | 1.088160620  |
| C | -5.739407440 | -2.358272310 | 0.067553030  |
| C | -4.821937830 | -3.435818360 | -1.861869430 |
| H | -2.786528620 | -2.940043800 | -2.269905680 |
| H | 4.041464140  | -3.924988230 | 4.015082960  |
| C | 2.274185330  | -5.238871910 | 3.872772760  |
| H | 0.259103300  | -6.012616550 | 3.414282400  |
| H | -3.131276510 | 2.106351780  | -2.721408420 |
| C | -3.024503110 | 4.035454440  | -3.629926050 |
| C | -0.955163270 | 5.185599980  | -3.279320960 |
| H | 0.469655400  | 4.109973990  | -2.107999130 |
| H | 6.513496650  | 2.136866250  | -0.788375300 |
| C | 5.971898440  | 3.266962920  | 1.028146890  |
| H | 4.838815080  | 4.097594960  | 2.729857050  |
| H | -6.520689070 | -2.132597600 | 0.791110590  |
| C | -5.980882900 | -3.262969300 | -1.025772430 |
| H | -4.848125760 | -4.097273780 | -2.725939940 |
| C | 2.770285550  | -6.346603870 | 4.607655870  |
| H | -4.028175720 | 3.916228520  | -4.034072110 |
| C | -2.265624440 | 5.234494310  | -3.873384390 |
| H | -0.257291680 | 6.013023620  | -3.393931790 |
| C | 7.210816100  | 3.920930700  | 1.253401110  |
| C | -7.221904370 | -3.912238660 | -1.253061010 |
| C | 4.094441560  | -6.406729320 | 5.165605710  |
| C | 2.008006290  | -7.537190990 | 4.871573160  |
| C | -2.756974290 | 6.342258520  | -4.611328820 |
| C | 8.366650380  | 3.752840400  | 0.414274760  |
| C | 7.451438350  | 4.824220250  | 2.346499550  |
| C | -8.378680750 | -3.739217300 | -0.416197960 |
| C | -7.464071610 | -4.815000110 | -2.346262570 |
| H | 4.790218960  | -5.577659940 | 5.045786250  |
| C | 4.529253950  | -7.513756670 | 5.861420550  |
| C | 2.544117430  | -8.587908170 | 5.584233330  |
| H | 0.984493510  | -7.637307910 | 4.513253990  |
| C | -4.071120110 | 6.395728650  | -5.193047040 |
| C | -1.998743500 | 7.539631530  | -4.855616150 |
| H | 8.336878530  | 3.096908790  | -0.454518390 |
| C | 9.546744780  | 4.412516830  | 0.679995030  |
| C | 8.676476030  | 5.431697980  | 2.517393720  |
| H | 6.668081120  | 5.050385810  | 3.068486010  |
| H | -8.348113460 | -3.082748480 | 0.452159520  |
| C | -9.560763740 | -4.394582090 | -0.683687320 |
| C | -8.691068670 | -5.417998150 | -2.518999080 |
| H | -6.680299560 | -5.044472180 | -3.066749940 |
| N | 3.801650370  | -8.639314230 | 6.105997490  |
| H | 5.546943400  | -7.514412510 | 6.263715590  |
| H | 1.925030280  | -9.472946360 | 5.759986830  |
| H | -4.762326100 | 5.560394920  | -5.091726640 |
| C | -4.501344430 | 7.503291820  | -5.890830550 |

|   |               |              |              |
|---|---------------|--------------|--------------|
| C | -2.529880100  | 8.590571400  | -5.571543520 |
| H | -0.982854790  | 7.645659310  | -4.477805360 |
| N | 9.767362490   | 5.267500860  | 1.717693080  |
| H | 10.399103000  | 4.252460350  | 0.012654090  |
| H | 8.811654940   | 6.111466570  | 3.364155200  |
| N | -9.782744680  | -5.249318140 | -1.721304470 |
| H | -10.413749310 | -4.230839350 | -0.018037880 |
| H | -8.827339030  | -6.097608090 | -3.365714530 |
| N | -3.778077110  | 8.635723570  | -6.115748640 |
| H | -5.511181100  | 7.498273730  | -6.312438940 |
| H | -1.914390040  | 9.481288270  | -5.730712800 |

Table S9. The optimized coordinates of the  $[\text{Re}_6\text{S}_8\text{Cl}_2\text{bipy}_4]^n$  ( $n=8^-$ ;  $S=0$ ) cluster calculated at S12g/TZP/ZORA/DMSO level of theory.

|    |              |              |              |
|----|--------------|--------------|--------------|
| Re | 0.591394510  | -1.389331520 | 1.105634650  |
| Re | 1.593559490  | 0.893449360  | 0.264962170  |
| Re | -1.604207580 | -0.901375490 | -0.259278010 |
| Re | -0.727997410 | 0.853728430  | 1.470608850  |
| Re | 0.716852940  | -0.862136340 | -1.464983850 |
| S  | 2.687721390  | -1.241041980 | -0.107383090 |
| S  | -0.265331800 | -2.899247120 | -0.592382610 |
| S  | -1.616234410 | -1.301605860 | 2.130940500  |
| S  | 1.352107830  | 0.361307770  | 2.615296940  |
| N  | 1.248929810  | -2.937137380 | 2.372192290  |
| Re | -0.601419930 | 1.381417960  | -1.099964030 |
| S  | 0.254552600  | 2.890592820  | 0.599761350  |
| S  | 1.606166350  | 1.292347770  | -2.125596490 |
| N  | 3.414780260  | 1.911256630  | 0.563199680  |
| S  | -2.698465950 | 1.233328240  | 0.111468030  |
| S  | -1.363211160 | -0.367707950 | -2.609492880 |
| N  | -3.426547050 | -1.917651690 | -0.557999690 |
| Cl | -1.723982070 | 2.038131860  | 3.496952170  |
| Cl | 1.711379100  | -2.047309520 | -3.491396010 |
| C  | 2.516627660  | -2.965553080 | 2.935720270  |
| C  | 0.496636300  | -4.076717820 | 2.621444140  |
| N  | -1.252776350 | 2.934870650  | -2.362347830 |
| C  | 4.520279170  | 1.736243420  | -0.253263710 |
| C  | 3.620614480  | 2.797146280  | 1.608208110  |
| C  | -4.532016990 | -1.739897350 | 0.257974090  |
| C  | -3.634260530 | -2.802631360 | -1.603367160 |
| H  | 3.111397820  | -2.068994250 | 2.775702390  |
| C  | 3.025831700  | -4.014389540 | 3.644560430  |
| C  | 0.941425660  | -5.160158280 | 3.321312720  |
| H  | -0.509958440 | -4.062558040 | 2.209653430  |
| C  | -2.513230810 | 2.963856050  | -2.941249910 |
| C  | -0.497766380 | 4.075125630  | -2.600501500 |
| H  | 4.376672900  | 1.051849910  | -1.085888110 |
| C  | 5.724260930  | 2.352396650  | -0.069771240 |
| C  | 4.794887830  | 3.448460010  | 1.852093080  |
| H  | 2.760432020  | 2.959100660  | 2.253354060  |
| H  | -4.386859540 | -1.056648410 | 1.091262770  |
| C  | -5.737754010 | -2.352186800 | 0.073360820  |
| C  | -4.810342590 | -3.450447300 | -1.848241570 |



|   |               |              |              |
|---|---------------|--------------|--------------|
| H | -2.773970150  | -2.967033700 | -2.247819150 |
| H | 4.036477090   | -3.895753230 | 4.034371820  |
| C | 2.276152770   | -5.233899670 | 3.888645520  |
| H | 0.239049880   | -5.984140590 | 3.444144150  |
| H | -3.110659270  | 2.067868940  | -2.787586700 |
| C | -3.013183070  | 4.012612540  | -3.656905230 |
| C | -0.933948510  | 5.158964830  | -3.304893400 |
| H | 0.503387410   | 4.061108000  | -2.175888210 |
| H | 6.505599260   | 2.120494500  | -0.793046860 |
| C | 5.975738150   | 3.274404600  | 1.024159880  |
| H | 4.810791620   | 4.120094320  | 2.709940580  |
| H | -6.518668280  | -2.118667760 | 0.796561110  |
| C | -5.991505790  | -3.272577470 | -1.021421350 |
| H | -4.827620460  | -4.122018430 | -2.706124640 |
| C | 2.776330010   | -6.340257110 | 4.588267710  |
| H | -4.019242610  | 3.894397700  | -4.058533820 |
| C | -2.260400350  | 5.232239140  | -3.891032720 |
| H | -0.230499300  | 5.983548080  | -3.416876820 |
| C | 7.199622360   | 3.916339880  | 1.250995180  |
| C | -7.217535530  | -3.910040360 | -1.249182150 |
| C | 4.112228110   | -6.417219720 | 5.151187640  |
| C | 2.025696250   | -7.556578340 | 4.841986360  |
| C | -2.750620770  | 6.339182880  | -4.596776180 |
| C | 8.380405210   | 3.746246260  | 0.422264770  |
| C | 7.452531040   | 4.836440870  | 2.346151180  |
| C | -8.398126480  | -3.735461660 | -0.421011180 |
| C | -7.473305310  | -4.829609500 | -2.344158700 |
| H | 4.807448430   | -5.584196320 | 5.046906960  |
| C | 4.550734830   | -7.532227450 | 5.825501250  |
| C | 2.570193230   | -8.612715170 | 5.533915600  |
| H | 1.001231450   | -7.661536710 | 4.484553070  |
| C | -4.075883800  | 6.414726360  | -5.184353200 |
| C | -1.998090910  | 7.557706390  | -4.833694510 |
| H | 8.360157900   | 3.085332300  | -0.444419900 |
| C | 9.556902730   | 4.403027580  | 0.694159370  |
| C | 8.676802740   | 5.437168810  | 2.519629600  |
| H | 6.667932040   | 5.073566680  | 3.064883480  |
| H | -8.375955650  | -3.074303670 | 0.445425730  |
| C | -9.576925530  | -4.387806850 | -0.693417460 |
| C | -8.699680620  | -5.425982630 | -2.517979620 |
| H | -6.689116080  | -5.070121830 | -3.062228290 |
| N | 3.834041710   | -8.676295290 | 6.059285470  |
| H | 5.570919550   | -7.530526350 | 6.224948360  |
| H | 1.952708230   | -9.503599230 | 5.693248490  |
| H | -4.770746400  | 5.579510610  | -5.096415940 |
| C | -4.504299530  | 7.530674810  | -5.863543140 |
| C | -2.532310800  | 8.614821570  | -5.531975710 |
| H | -0.980684520  | 7.664232150  | -4.457111840 |
| N | 9.785378450   | 5.270137690  | 1.730944160  |
| H | 10.412201510  | 4.232830440  | 0.030886020  |
| H | 8.804631470   | 6.121380960  | 3.365686850  |
| N | -9.808127270  | -5.254423660 | -1.730026980 |
| H | -10.431971250 | -4.213943800 | -0.030783070 |

|   |              |              |              |
|---|--------------|--------------|--------------|
| H | -8.829557340 | -6.110186910 | -3.363759650 |
| N | -3.786259010 | 8.677136420  | -6.080541100 |
| H | -5.516553420 | 7.527427630  | -6.282702960 |
| H | -1.913995150 | 9.507610450  | -5.676995060 |

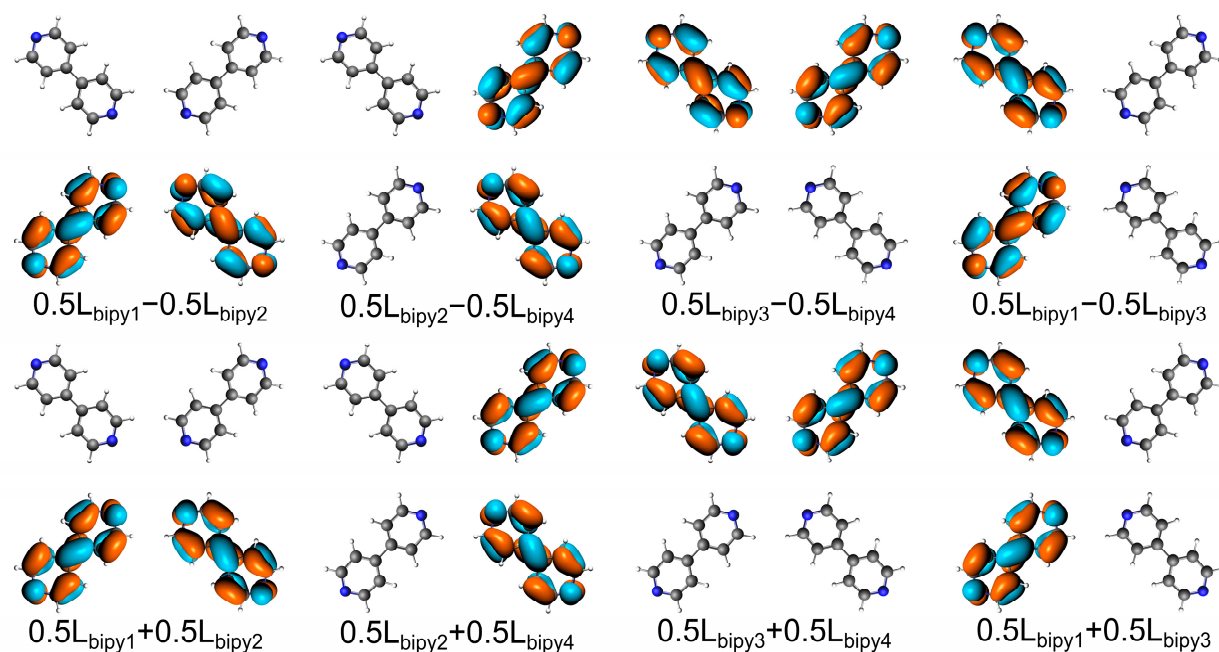

Figure S1. The bonding (bottom line) and antibonding (top line) hypothetical MOs in bipy<sub>4</sub> fragment composed from LUMO of bipy ligands in cis-positions.

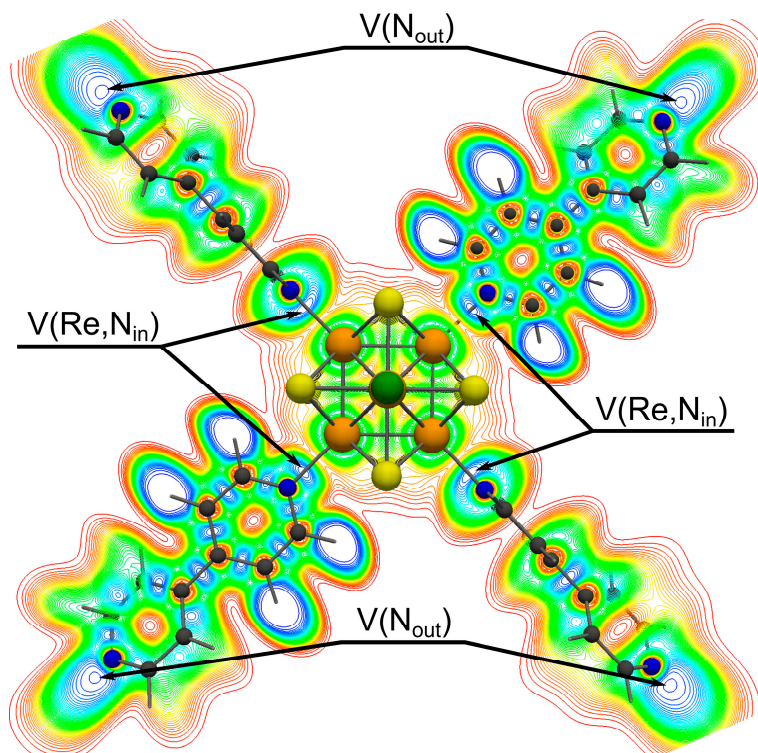

Figure S2. ELF slice plane passing through four N<sub>in</sub> atoms in Re<sub>6</sub>S<sub>8</sub>Cl<sub>2</sub>bipy<sub>4</sub> cluster.

Table S10. The average QTAIM charges for  $[\text{Re}_6\text{S}_8\text{Cl}_2\text{bipy}_4]^n$  ( $n=0, 2-, 4-, 6-, 8-$ ) cluster.

| <b>n</b>          | <b>0</b> | <b>2-</b> | <b>4-</b> | <b>6-</b> | <b>8-</b> |
|-------------------|----------|-----------|-----------|-----------|-----------|
| <b>S</b>          | <b>0</b> | <b>1</b>  | <b>2</b>  | <b>1</b>  | <b>0</b>  |
| Re                | 1.08     | 1.08      | 1.08      | 1.08      | 1.09      |
| S                 | -0.71    | -0.74     | -0.75     | -0.80     | -0.81     |
| Cl                | -0.71    | -0.74     | -0.75     | -0.78     | -0.80     |
| N                 | -1.16    | -1.15     | -1.17     | -1.16     | -1.18     |
| N <sub>term</sub> | -1.10    | -1.10     | -1.13     | -1.15     | -1.18     |
| C                 | 0.19     | 0.16      | 0.13      | 0.10      | 0.08      |
| H                 | 0.07     | 0.05      | 0.03      | 0.02      | -0.01     |
| bipy              | 0.17     | -0.26     | -0.75     | -1.15     | -1.63     |
